# Supplementary material
Source: PubMed Central journal article supplement (PMC4155750)

**Supplementary information 2 | Application of structure-based drug design to generate selective PDE 9A (A, B) and PDE10A inhibitors.**  
 Stacking against the conserved phenylalanine and hydrogen bonding with the invariant glutamine are two characteristics of most PDE inhibitors, as shown in the examples of the binding of 6-amino-pyrazolopyrimidinone-derived PDE9<sup>1,2</sup> (A, B) and pyrazoloquinoline-derived PDE10<sup>3,4,5</sup> (C, D) inhibitors in the active site pockets. Dotted lines represent hydrogen bonds. (A,C) Ribbon diagram of the inhibitor (yellow sticks). Dotted lines represent hydrogen bonds. (B,D) Surface model of the inhibitor binding.

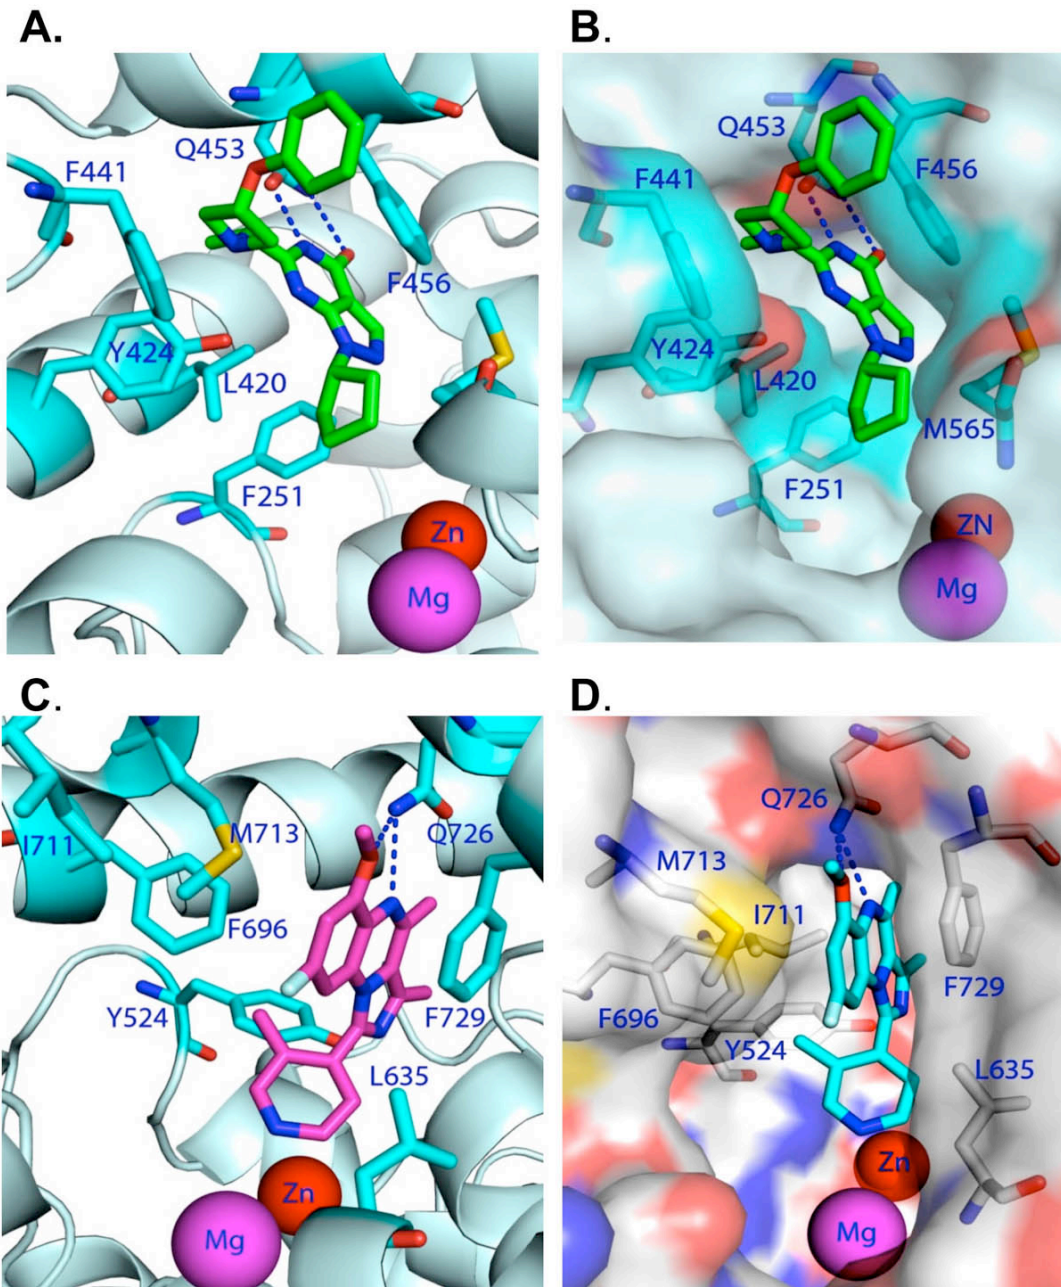

1. Meng, F. *et al.* Structure-based discovery of highly selective phosphodiesterase-9A inhibitors and implications for inhibitor design. *J. Med. Chem.* **55**, 8549-8558 (2012).
2. Claffey, M. M. *et al.* Application of structure-based drug design and parallel chemistry to identify selective, brain-penetrant, in vivo active PDE 9A inhibitors. *J. Med. Chem.* **55**, 9055-9068 (2012).
3. Ho, G. D. *et al.* The SAR development of dihydroimidazoisoquinoline derivatives as phosphodiesterase 10A inhibitors for the treatment of schizophrenia. *Bioorg. Med. Chem. Lett.* **22**, 2585-2589 (2012).
4. Malamas, M., Ni, Y. & Erdei, J. Highly potent, selective, and orally active phosphodiesterase 10A inhibitors. *J. Med. Chem.* **54**, 7621-7638 (2011).
5. Verhoest, P. R. *et al.* Discovery of a novel class of phosphodiesterase 10A inhibitors and identification of clinical candidate 2-[4-(1-methyl-4-pyridin-4-yl-1H-pyrazol-3-yl)-phenoxy-methyl]-quinoline (PF-2545920) for the treatment of schizophrenia. *J. Med. Chem.* **52**, 5188-5196 (2009).

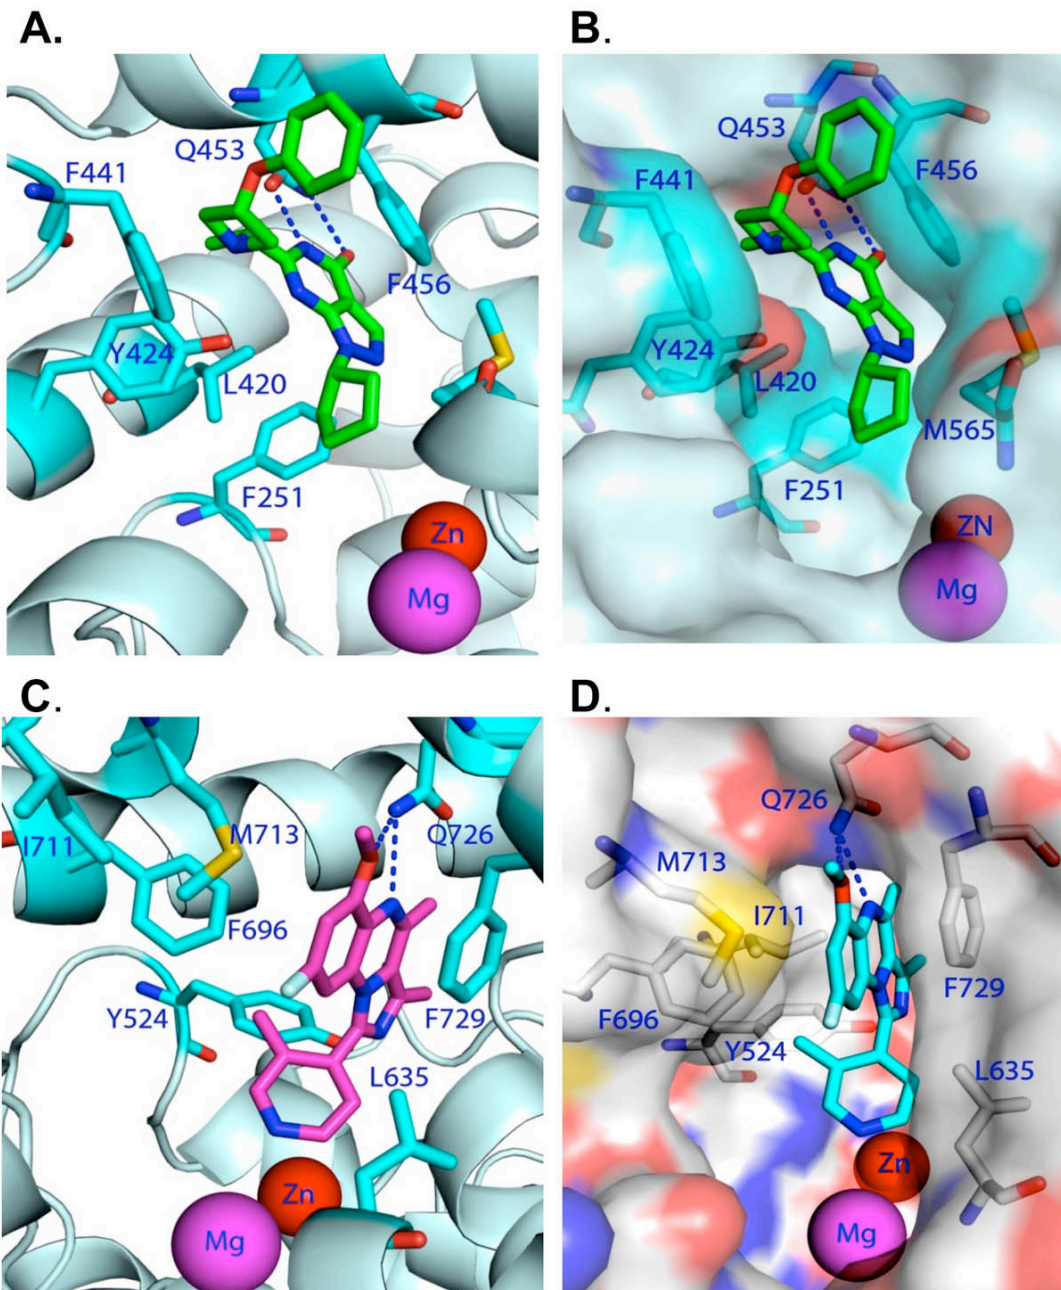

Supplement: NIHMS622246-supplement-Supp_Data.pdf [file NIHMS622246-supplement-Supp_Data.pdf]
